# Supplementary material
Source: HighWire-hosted journal article supplement (https://www.annfammed.org/highwire/filestream/8058/field_highwire_adjunct_files/2/RAppendix_3.pdf)
Supplement: RAppendix_3.pdf [file RAppendix_3.pdf]

Roetzheim RG, Christman LK, Jacobsen PB, et al. A randomized controlled trial to increase cancer screening among attendees of community health centers. *Ann Fam Med.* 2004;2:294-300.

<http://www.annfammed.org/cgi/content/full/2/4/294/DC1>

### Appendix 3. Clinical Predictors of Screening Mammography, Papanicolaou Smears, and Fecal Occult Blood Testing

| Variable                                            | Odds Ratio | 95% CI      | P Value |
|-----------------------------------------------------|------------|-------------|---------|
| <b>Clinical predictors of screening mammography</b> |            |             |         |
| Age, y                                              | 1.00       | 0.98 – 1.02 | .99     |
| Race-ethnicity                                      |            |             |         |
| White                                               | 1.00       |             |         |
| African American                                    | 1.43       | 1.04 – 1.96 | .03     |
| Hispanic                                            | 1.89       | 1.18 – 3.02 | .008    |
| Marital status                                      |            |             |         |
| Not married                                         | 1.00       |             |         |
| Married                                             | 0.94       | 0.72 – 1.24 | .68     |
| Primary language spoken                             |            |             |         |
| Non-English                                         | 1.00       |             |         |
| English                                             | 1.48       | 0.90 – 2.43 | .12     |
| Health insurance                                    |            |             |         |
| County                                              | 1.00       |             |         |
| Medicare                                            | 0.77       | 0.57 – 1.06 | .11     |
| Medicaid                                            | 0.89       | 0.64 – 1.26 | .52     |
| Other                                               | 0.86       | 0.57 – 1.31 | .48     |
| Smoking status                                      |            |             |         |
| Nonsmoker                                           | 1.00       |             |         |
| Smoker                                              | 0.90       | 0.68 – 1.19 | .46     |
| Charlson comorbidity                                | 0.92       | 0.83 – 1.01 | .07     |
| Number of chronic illnesses                         | 1.00       | 0.96 – 1.05 | .90     |
| Number of medications                               | 1.00       | 0.97 – 1.04 | .88     |
| Number of visits                                    | 1.11       | 1.06 – 1.15 | <.0001  |
| Family history of breast cancer                     |            |             |         |
| No                                                  | 1.00       |             |         |
| Yes                                                 | 1.54       | 0.92 – 2.58 | .10     |

*Continued*

Online Supplementary Data

<http://www.annfammed.org/cgi/content/full/2/4/294/DC1>

| Variable                                          | Odds Ratio | 95% CI      | P Value |
|---------------------------------------------------|------------|-------------|---------|
| History of benign breast disease                  |            |             |         |
| No                                                | 1.00       |             |         |
| Yes                                               | 1.90       | 0.72 – 5.02 | .19     |
| Estrogen replacement therapy                      |            |             |         |
| No                                                | 1.00       |             |         |
| Yes                                               | 2.18       | 1.65 – 2.88 | <.0001  |
| History of hysterectomy                           |            |             |         |
| No                                                | 1.00       |             |         |
| Yes                                               | 1.31       | 1.04 – 1.66 | .02     |
| <b>Clinical predictors of Papanicolaou smears</b> |            |             |         |
| Age, y                                            | 0.96       | 0.94 – 0.98 | .0005   |
| Race-ethnicity                                    |            |             |         |
| White                                             | 1.00       |             |         |
| African American                                  | 1.42       | 0.96 – 2.08 | .08     |
| Hispanic                                          | 1.59       | 0.98 – 2.57 | .06     |
| Marital status                                    |            |             |         |
| Not married                                       | 1.00       |             |         |
| Married                                           | 1.02       | 0.73 – 1.42 | .91     |
| Primary language spoken                           |            |             |         |
| Non-English                                       | 1.00       |             |         |
| English                                           | 0.90       | 0.54 – 1.50 | .69     |
| Health insurance                                  |            |             |         |
| County                                            | 1.00       |             |         |
| Medicare                                          | 0.63       | 0.43 – 0.92 | .02     |
| Medicaid                                          | 0.73       | 0.48 – 1.09 | .12     |
| Other                                             | 1.04       | 0.63 – 1.72 | .89     |
| Smoking status                                    |            |             |         |
| Nonsmoker                                         | 1.00       |             |         |
| Smoker                                            | 1.33       | 0.95 – 1.87 | .10     |
| Charlson comorbidity                              | 0.82       | 0.73 – 0.92 | .0006   |
| Number of chronic illnesses                       | 0.97       | 0.92 – 1.03 | .33     |
| Number of medications                             | 1.00       | 0.96 – 1.05 | .91     |
| Number of visits                                  | 1.10       | 1.06 – 1.15 | <.0001  |
| Estrogen replacement therapy                      |            |             |         |
| No                                                | 1.00       |             |         |
| Yes                                               | 1.74       | 1.24 – 2.44 | <.002   |

*Continued*

Online Supplementary Data

<http://www.annfammed.org/cgi/content/full/2/4/294/DC1>

| Variable                                                 | Odds Ratio | 95% CI       | P Value |
|----------------------------------------------------------|------------|--------------|---------|
| <b>Clinical predictors of fecal occult blood testing</b> |            |              |         |
| Age, y                                                   | 1.02       | 1.002 – 1.04 | .03     |
| Race-ethnicity                                           |            |              |         |
| White                                                    | 1.00       |              |         |
| African American                                         | 1.33       | 0.98 – 1.81  | .07     |
| Hispanic                                                 | 1.27       | 0.80 – 2.02  | .31     |
| Marital status                                           |            |              |         |
| Not married                                              | 1.00       |              |         |
| Married                                                  | 1.04       | 0.80 – 1.34  | .78     |
| Primary language spoken                                  |            |              |         |
| Non-English                                              | 1.00       |              |         |
| English                                                  | 0.91       | 0.57 – 1.47  | .70     |
| Health insurance                                         |            |              |         |
| County                                                   | 1.00       |              |         |
| Medicare                                                 | 0.73       | 0.54 – 0.998 | .047    |
| Medicaid                                                 | 0.83       | 0.60 – 1.16  | .28     |
| Other                                                    | 0.82       | 0.54 – 1.23  | .34     |
| Smoking status                                           |            |              |         |
| Nonsmoker                                                | 1.00       |              |         |
| Smoker                                                   | 0.95       | 0.73 – 1.23  | .67     |
| Charlson comorbidity                                     | 0.86       | 0.78 – 0.94  | .0008   |
| Number of chronic illnesses                              | 1.01       | 0.96 – 1.06  | .71     |
| Number of medications                                    | 0.99       | 0.96 – 1.03  | .71     |
| Number of visits                                         | 1.09       | 1.05 – 1.12  | <.0001  |

CI = confidence interval
